# Supplementary material for: Safety and tolerability of conditioning chemotherapy followed by CD19-targeted CAR T cells for relapsed/refractory CLL
Source: JCI journal article supplement (doi:10.1172/jci.insight.122627), 2019-04-02

## Supplementary Materials

**Table S1: Definitions of dose-limiting toxicity (DLT) and maximum tolerated dose (MTD)**

|                                                                                                              |                                                                                                                                                                                                                                                                                                                                                                                                                                                                                                                                                                |
|--------------------------------------------------------------------------------------------------------------|----------------------------------------------------------------------------------------------------------------------------------------------------------------------------------------------------------------------------------------------------------------------------------------------------------------------------------------------------------------------------------------------------------------------------------------------------------------------------------------------------------------------------------------------------------------|
| DLT was defined as any of the following occurring within 30 days of the last infusion of 19-28z CAR T-cells: |                                                                                                                                                                                                                                                                                                                                                                                                                                                                                                                                                                |
|                                                                                                              | Grade 4 neutropenia (<500/ $\mu$ L) lasting 30 days or more from time of infusion (in patients with pretreatment absolute neutrophil count >500/ $\mu$ L) unless due to persistent disease.                                                                                                                                                                                                                                                                                                                                                                    |
|                                                                                                              | Grade 3 or 4 thrombocytopenia that fails to recover to grade $\leq 2$ at 30 days post-infusion (in patients with pretreatment platelet count >50,000/ $\mu$ L) unless due to persistent disease.                                                                                                                                                                                                                                                                                                                                                               |
|                                                                                                              | New grade 3 or 4 non-hematologic toxicities lasting $\geq 14$ days, probably or definitively attributed to CAR T-cell infusion, not attributed to chemotherapy received or to persistent disease.                                                                                                                                                                                                                                                                                                                                                              |
|                                                                                                              | Grade 4 neurologic toxicity, grade 4 cytokine release syndrome (CRS; see Table S2), or protocol-defined severe CRS, including hypotension with systolic blood pressure <90 mmHg refractory to fluid challenge or requiring vasopressors, or hypoxia/respiratory distress requiring increasing supplemental oxygen or ventilatory support, or acute coronary syndrome with detectable troponin and electrocardiogram changes, or seizure (clinically suspected or documented by electroencephalogram) not improving after 24 hours of systemic corticosteroids. |
|                                                                                                              | Any grade 4 seizure.                                                                                                                                                                                                                                                                                                                                                                                                                                                                                                                                           |
|                                                                                                              | Any grade 5 toxicity (death) attributable (possibly, probably, or definitely) to CAR T-cell infusion.                                                                                                                                                                                                                                                                                                                                                                                                                                                          |
| MTD was defined as the highest dose studied for which the incidence of DLT was <33%.                         |                                                                                                                                                                                                                                                                                                                                                                                                                                                                                                                                                                |

**Table S2: Cytokine release syndrome (CRS) grading criteria**

| <b>Grade</b> | <b>Definitions</b>                                                                                                                                         |
|--------------|------------------------------------------------------------------------------------------------------------------------------------------------------------|
| Grade 1      | Mild symptoms, requiring observation or symptomatic management only (e.g., antipyretics, antiemetics, pain medications, etc.)                              |
| Grade 2      | Moderate symptoms<br>Hypotension requiring vasopressors <24 hours, or<br>Hypoxia or dyspnea requiring supplemental oxygen <40% (up to 6L by nasal cannula) |
| Grade 3      | Severe symptoms<br>Hypotension requiring vasopressors $\geq$ 24 hours, or<br>Hypoxia or dyspnea requiring supplemental oxygen $\geq$ 40%                   |
| Grade 4      | Life-threatening symptoms<br>Hypotension refractory to vasopressors, or<br>Hypoxia or dyspnea requiring mechanical ventilation                             |
| Grade 5      | Death                                                                                                                                                      |

**Table S3: Disease burden at time of conditioning chemotherapy (if applicable) and CAR T-cell infusion**

| Pt # | Inf #           | Disease | ALC (K/mL)    | BM disease burden  |                                           | Spleen size (longest axis) | Nodal disease burden                                                                                              |
|------|-----------------|---------|---------------|--------------------|-------------------------------------------|----------------------------|-------------------------------------------------------------------------------------------------------------------|
|      |                 |         |               | Cellularity        | Involvement                               |                            |                                                                                                                   |
| 1    |                 | CLL     | 196.6         | 90%                | 100% (IHC); 98% lymphs (BMA)              | 15.9 cm                    | Extensive; above and below diaphragm, up to 4.4 cm in longest axis                                                |
| 2    |                 | CLL     | 1.4           | Unknown            | Unknown                                   | Normal                     | Extensive; in neck and above and below diaphragm, up to 7.0 cm in longest axis                                    |
| 3    |                 | CLL     | 117.4         | 80%                | 100% (IHC); 78% (BMA)                     | 14.8 cm                    | Extensive; above and below diaphragm, up to 7.7 cm in longest axis                                                |
| 4    |                 | CLL     | 148.5         | 80%                | 100% (IHC); 79% lymphs (BMA)              | Normal                     | Extensive; bulky disease above and below diaphragm, with two largest nodal masses each >22 cm in longest axis     |
| 5    |                 | CLL     | 44.5          | 60-70%             | 67% lymphs (BMA)                          | 17 cm                      | Extensive; above and below diaphragm, with largest bulky abdominal nodal mass 12.9 cm in longest axis             |
| 6    |                 | CLL     | 92.2          | 70%                | 97% lymphs (BMA)                          | s/p splenectomy            | Extensive; in neck and above and below diaphragm, with two largest bulky nodal masses each >10 cm in longest axis |
| 7    |                 | CLL     | 1.0           | 20-50% (patchy)    | 10% (IHC); 36% lymphs (BMA)               | Normal                     | Extensive; above and below diaphragm; largest abdominal nodal mass 4.4 cm in longest axis                         |
| 8    | 1 <sup>st</sup> | CLL     | 3.3           | 60-70%             | 70-80% (IHC); 47% lymphs (BMA)            | 21 cm                      | Extensive; in neck and above and below diaphragm, up to 8.5 cm in longest axis; also w/ hepatomegaly (22 cm)      |
|      | 2 <sup>nd</sup> |         | 9.1           | 60%                | 50% (IHC); 48% lymphs (BMA)               | 20.5 cm                    | Extensive; in neck and above and below diaphragm, up to 8.7 cm in longest axis; also w/ hepatomegaly (21.6 cm)    |
| 9    |                 | CLL     | 2.9           | No trephine biopsy | 32% lymphs (BMA)                          | Normal                     | Mild diffuse adenopathy above and below diaphragm, up to 2.1 cm in longest axis                                   |
| 10   |                 | CLL     | 1.3           | No trephine biopsy | 11% lymphs (BMA)                          | Normal                     | Mild diffuse adenopathy in neck and above and below diaphragm, up to 2.2 cm in longest axis                       |
| 11   |                 | CLL     | 3.3           | Inadequate biopsy  | 71% lymphs (BMA)                          | Normal                     | Mild diffuse adenopathy above and below diaphragm, up to 2.6 cm in longest axis                                   |
| 12   |                 | CLL     | 0.6           | 50%                | NED (IHC); 16% lymphs (BMA); 0.63% (FACS) | Normal                     | Borderline adenopathy above and below diaphragm, all <1.5 cm in longest axis                                      |
| 13   |                 | CLL     | 1.8           | 50-60%             | 10-15% (IHC); 18% lymphs (BMA)            | Normal                     | Borderline adenopathy above and below diaphragm, all <1.5 cm in longest axis; also w/ hepatomegaly (21 cm)        |
| 14   |                 | CLL     | 0.6           | 30%                | 20-30% (IHC); 59% lymphs (BMA)            | 12.3 cm                    | Borderline abdominopelvic adenopathy, all <1.5 cm in longest axis                                                 |
| 15   | 1 <sup>st</sup> | CLL     | 1.3           | 80%                | 70-80% (IHC); 75% lymphs (BMA)            | 15.1 cm                    | Diffuse; above and below diaphragm (largely below), up to 4.6 cm in longest axis                                  |
|      | 2 <sup>nd</sup> |         | Total WBC 0.2 | 50%                | 90% (IHC); 89% lymphs BMA                 | 15.4 cm                    | Diffuse; above and below diaphragm (largely below), up to 3.3 cm in longest axis                                  |
| 16   | 1 <sup>st</sup> | CLL     | 1.3           | 90%                | 60% (IHC); 54% lymphs (BMA)               | 15 cm                      | Diffuse; in neck and above and below diaphragm, up to 3.7 cm in longest axis; also with hepatomegaly (22-23 cm)   |

|    |                 |     |               |                   |                                            |                 |                                                                                                                 |
|----|-----------------|-----|---------------|-------------------|--------------------------------------------|-----------------|-----------------------------------------------------------------------------------------------------------------|
|    | 2 <sup>nd</sup> |     | Total WBC 0.2 | 80%               | 20% (IHC); 49% lymphs (BMA)                | Not reassessed  | Not reimaged prior to CAR T-cell infusion                                                                       |
|    | 3 <sup>rd</sup> |     | 0.7           | 50%               | NED (IHC); 13% lymphs (BMA); 0.032% (FACS) | 12 cm           | Diffuse; in neck and above and below diaphragm, up to 4.3 cm in longest axis; also with hepatomegaly (22-23 cm) |
|    | 4 <sup>th</sup> |     | 0.5           |                   |                                            |                 |                                                                                                                 |
| 17 |                 | FL  | 0.3           | 50-60%            | NED (IHC, FACS)                            | Normal          | Extensive; above and below diaphragm, up to 10.1 cm in longest axis                                             |
| 18 |                 | MZL | 0.3           | Inadequate biopsy | NED (FACS)                                 | Normal          | No significant adenopathy                                                                                       |
| 19 |                 | MZL | 2.5           | 30%               | NED (IHC, FACS)                            | s/p splenectomy | No significant adenopathy                                                                                       |
| 20 | 1 <sup>st</sup> | MCL | 0.1           | >80%              | NED (IHC, FACS)                            | Normal          | Extensive; in neck and above and below diaphragm (largely below), up to 10.3 cm in longest axis                 |
|    | 2 <sup>nd</sup> |     | 0.1           |                   |                                            |                 |                                                                                                                 |

Legend: BM, bone marrow; BMA, bone marrow aspirate; CLL, chronic lymphocytic leukemia; FACS, flow cytometry; FL, follicular lymphoma; IHC, immunohistochemistry; Inf, infusion; MCL, mantle cell lymphoma; MZL, marginal zone lymphoma; NED, no evidence of disease; Pt, patient.

**Table S4: Specific therapies administered prior to CAR T-cell therapy among patients with CLL**

| Pt # | Number of Prior Therapies | Specific prior therapies (lines of therapy are split by semicolon)                                                                                                       |
|------|---------------------------|--------------------------------------------------------------------------------------------------------------------------------------------------------------------------|
| 1    | 2                         | FCR; PCRm                                                                                                                                                                |
| 2    | 5                         | Flu (single agent); rituximab (single agent); PCR; rituximab (single agent); PCRm                                                                                        |
| 3    | 3                         | Chlorambucil (single agent); Cy (single agent); PCR                                                                                                                      |
| 4    | 4                         | Flu (single agent); Cy (single agent); rituximab (single agent); PCRm                                                                                                    |
| 5    | 1                         | PCR                                                                                                                                                                      |
| 6    | 7                         | RCVP; rituximab (single agent); PCR; Cy + rituximab; rituximab (single agent); Cy + rituximab; Benda (single agent)                                                      |
| 7    | 5                         | CVP; rituximab (single agent); Cy + rituximab; PCR; PCRm                                                                                                                 |
| 8    | 4                         | RCHOP; alemtuzumab (single agent); alemtuzumab + rituximab; RCVP                                                                                                         |
| 9    | 3                         | FC; RCV (then Cy + rituximab); BR                                                                                                                                        |
| 10   | 2                         | FCR, BR                                                                                                                                                                  |
| 11   | 11                        | FC; Dex (single agent); PC; Cy + rituximab; lenalidomide; idelalisib; Dex (single agent); Ofa (single agent); ibrutinib; dasatinib (single agent); ibrutinib + dasatinib |
| 12   | 4                         | RCHOP; FCR; BR; ibrutinib                                                                                                                                                |
| 13   | 1                         | Ibrutinib + rituximab                                                                                                                                                    |
| 14   | 5                         | FR; BR; second course of BR; RICE; ibrutinib                                                                                                                             |
| 15   | 6                         | FCR; second course of FCR; Dex + rituximab; Cy + rituximab; Ofa (single agent); ibrutinib                                                                                |
| 16   | 8                         | FCR; BR; lenalidomide; ibrutinib; HDMP; obinutuzumab (single agent); idelalisib; venetoclax                                                                              |

Legend (in order of appearance): FCR=fludarabine, cyclophosphamide, rituximab; PCRm=pentostatin, cyclophosphamide, rituximab, mitoxantrone; Flu=fludarabine; Cy=cyclophosphamide; RCVP=rituximab, cyclophosphamide, vincristine, prednisone; Benda=bendamustine; CVP=cyclophosphamide, vincristine, prednisone; RCHOP=rituximab, cyclophosphamide, doxorubicin, vincristine, prednisone; FC=fludarabine and cyclophosphamide; RCV=rituximab, cyclophosphamide, and vincristine; BR=bendamustine and rituximab; Dex=dexamethasone; PC=pentostatin and cyclophosphamide; Ofa=ofatumomab; FR=fludarabine and rituximab; RICE=rituximab, ifosfamide, carboplatin, etoposide; HDMP=high-dose methylprednisolone

**Table S5: Management of ibrutinib at the time of CAR T-cell infusion**

| <b>Pt #</b> | <b>Ibrutinib management pre-CAR T-cell infusion</b>       | <b>Ibrutinib management post-CAR T-cell infusion</b>                                                                                                                                                                                          |
|-------------|-----------------------------------------------------------|-----------------------------------------------------------------------------------------------------------------------------------------------------------------------------------------------------------------------------------------------|
| 11          | Continued through date of CAR T-cell infusion             | Given on day 1 post-CAR T-cell infusion, then held due to development of CRS and neurologic toxicity. Resumed on day 13 post-CAR T-cell infusion after resolution of CRS and neurologic toxicity and subsequent hospital discharge.           |
| 12          | Continued through date of CAR T-cell infusion             | Continued without interruption                                                                                                                                                                                                                |
| 13          | Held beginning 3 days prior to CAR T-cell infusion        | Continued to be held in setting of CRS and neurologic toxicity. Resumed on day 59 post-CAR T-cell infusion in outpatient setting; had been discharged on day 21 post-CAR T-cell infusion following resolution of CRS and neurologic toxicity. |
| 14          | Held beginning 5 days prior to CAR T-cell infusion        | Continued to be held in setting of CRS and neurologic toxicity. Resumed on day 17 post-CAR T-cell infusion following resolution of CRS and neurologic toxicity.                                                                               |
| 15          | Held beginning 12 days prior to first CAR T-cell infusion | Resumed 24 days following first CAR T-cell infusion and then continued through second CAR T-cell infusion (30 days following the first CAR T-cell infusion) without interruption.                                                             |

**Table S6: Detailed inclusion/exclusion criteria:**

|                                                                                                                                                                                                                                                                                                                                                                                                                                                                                                                                                                                                                                                                                                                                                                                                                                                                                                                                                                                                                                                                                                                                                                                                                                                                                                                                                                                                           |
|-----------------------------------------------------------------------------------------------------------------------------------------------------------------------------------------------------------------------------------------------------------------------------------------------------------------------------------------------------------------------------------------------------------------------------------------------------------------------------------------------------------------------------------------------------------------------------------------------------------------------------------------------------------------------------------------------------------------------------------------------------------------------------------------------------------------------------------------------------------------------------------------------------------------------------------------------------------------------------------------------------------------------------------------------------------------------------------------------------------------------------------------------------------------------------------------------------------------------------------------------------------------------------------------------------------------------------------------------------------------------------------------------------------|
| <p><b>Patient population:</b> Patients with chronic lymphocytic leukemia (CLL) or indolent B-cell lymphoma who had relapsed or chemotherapy-refractory disease, or who had evidence of residual disease following therapy were eligible. Chemotherapy-refractory disease was defined by failure to achieve at least a partial response to the last therapy or disease progression within 6 months of the last therapy. Patients who initially responded to therapy but subsequently demonstrated disease progression after 6 months of completion of therapy were considered to have relapsed disease.</p>                                                                                                                                                                                                                                                                                                                                                                                                                                                                                                                                                                                                                                                                                                                                                                                                |
| <p><b>Inclusion criteria:</b></p> <ol style="list-style-type: none"><li>1. Patients must have the following CD19<sup>+</sup> B-cell leukemia or lymphoma either with relapsed or chemotherapy-refractory disease or with evidence of residual disease following therapy. In all cases, pathologic confirmation was required at the treating center (Memorial Sloan Kettering Cancer Center).<br/>--CLL: Patients must have a diagnosis of CLL as evidenced by flow cytometry, bone marrow histology, and/or cytogenetics.<br/>--Other low grade B-cell neoplasms eligible as well, including small lymphocytic lymphoma (SLL), follicular lymphoma, Waldenstrom macroglobulinemia, hairy cell leukemia, marginal zone lymphomas, and mantle cell lymphomas.</li><li>2. Creatinine <math>\leq 2.0</math> mg/100 ml, bilirubin <math>\leq 2.0</math> mg/100 ml, AST and ALT <math>\leq 3.0</math>x normal, PT and PTT <math>\leq 2</math>x normal outside the setting of stable chronic anticoagulation therapy.</li><li>3. Adequate cardiac function (left ventricular ejection fraction [LVEF] <math>\geq 40\%</math>) as assessed by echocardiogram or MUGA scan performed within 1 month of treatment.</li><li>4. Adequate pulmonary function as assessed by <math>\geq 92\%</math> oxygen saturation on room air by pulse oximetry.</li><li>5. Life expectancy of <math>&gt;3</math> months.</li></ol> |
| <p><b>Exclusion criteria:</b></p> <ol style="list-style-type: none"><li>1. Karnofsky performance status <math>&lt;70</math>.</li><li>2. CLL patients with active transformed disease (Richter syndrome).</li><li>3. Patients with following cardiac conditions:<br/>--New York Heart Association (NYHA) stage III or IV congestive heart failure.<br/>--Myocardial infarction <math>\leq 6</math> months prior to enrollment.<br/>--History of clinically significant ventricular arrhythmia or unexplained syncope, not believed to be vasovagal in nature or due to dehydration.<br/>--History of severe non-ischemic cardiomyopathy with LVEF <math>\leq 20\%</math>.</li><li>4. Patients with HIV, hepatitis B or hepatitis C infection.</li><li>5. Patients with any concurrent active malignancies as defined by malignancies requiring any therapy other than expectant observation.</li></ol>                                                                                                                                                                                                                                                                                                                                                                                                                                                                                                     |

**Table S7: Characteristics of commercially available antibodies used for CAR T-cell immunophenotyping**

| <b>Antibody</b> | <b>Fluorochrome</b> | <b>Manufacturer</b> | <b>Clone</b> |
|-----------------|---------------------|---------------------|--------------|
| CCR7            | FITC                | R&D Systems         | FAB197F      |
| CD45RA          | APC                 | Thermo Fisher       | MED-56       |
| CD62L           | FITC                | Thermo Fisher       | Dreg-56      |
| CD127           | eFlour450           | eBiosciences        | eBioRDR5     |
| CD27            | APC                 | BD Biosciences      | L128         |
| CD28            | FITC                | Invitrogen          | 10F3         |



## Supplementary Figure Legends:

**Figure S1:** Timeline of ibrutinib (IBR) exposure in patients undergoing autologous T-cell collection and/or CAR T-cell infusion during ibrutinib therapy.

**Figure S2:** (A) Median absolute lymphocyte count (ALC) on first day of CAR T-cell infusion following conditioning chemotherapy. (B) Median change in ALC from beginning of conditioning chemotherapy to first day of CAR T-cell infusion. Results are stratified by form of conditioning chemotherapy administered. Bars indicate interquartile range. Cy, cyclophosphamide; Flu, fludarabine.

**Figure S3:** Course and severity of cytokine release syndrome (CRS) in individual patients, as evaluated each day during inpatient admission following each 19-28z CAR T-cell infusion.

**Figure S4:** Course and severity of neurologic toxicity following each CAR T-cell infusion in individual patients, as evaluated each day during inpatient admission following each 19-28z CAR T-cell infusion.

**Figure S5:** Changes in immunoregulatory cytokine levels in evaluable patients receiving conditioning chemotherapy prior to 19-28z CAR T-cell infusion, stratified by status as on ibrutinib (IBR) at CAR T-cell infusion, IBR-naive, or post-IBR, including: (A) IL-6, (B) IL-10, (C) IFN- $\gamma$ , (D) IL-2, (E) GM-CSF, (F) Flt3L, (G) fractalkine, (H) IL-15, (I) MCP-3.

Figure S1

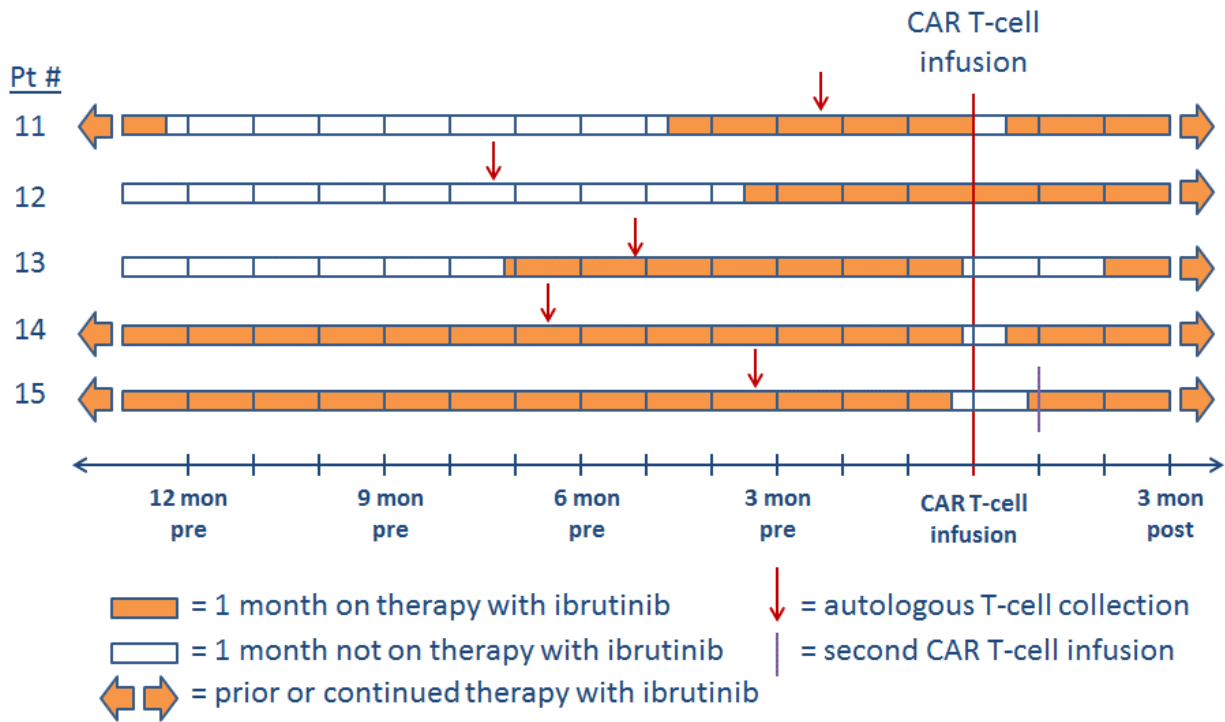

Figure S2

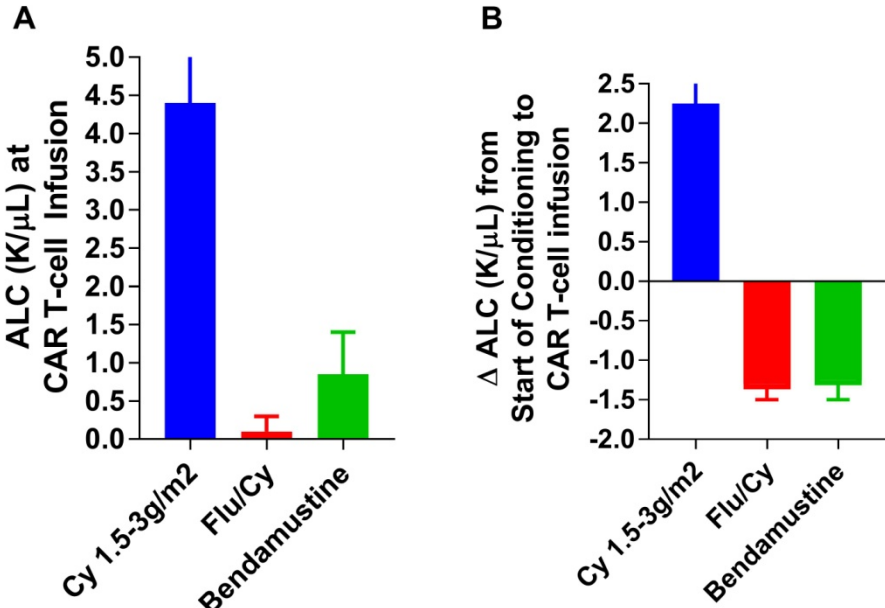

Figure S3

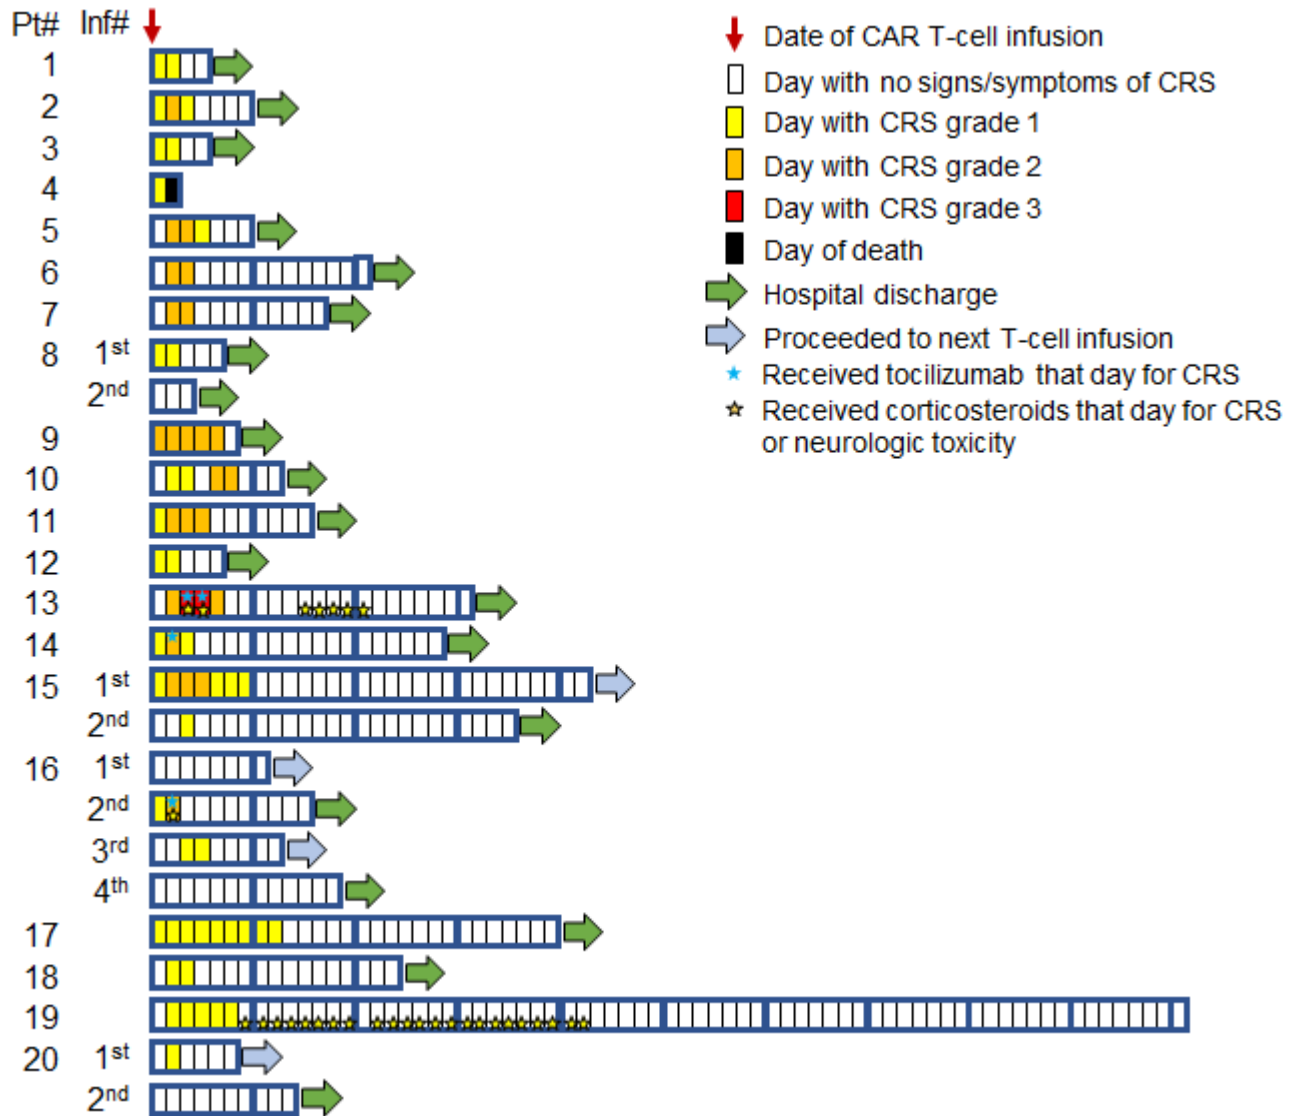

Figure S4

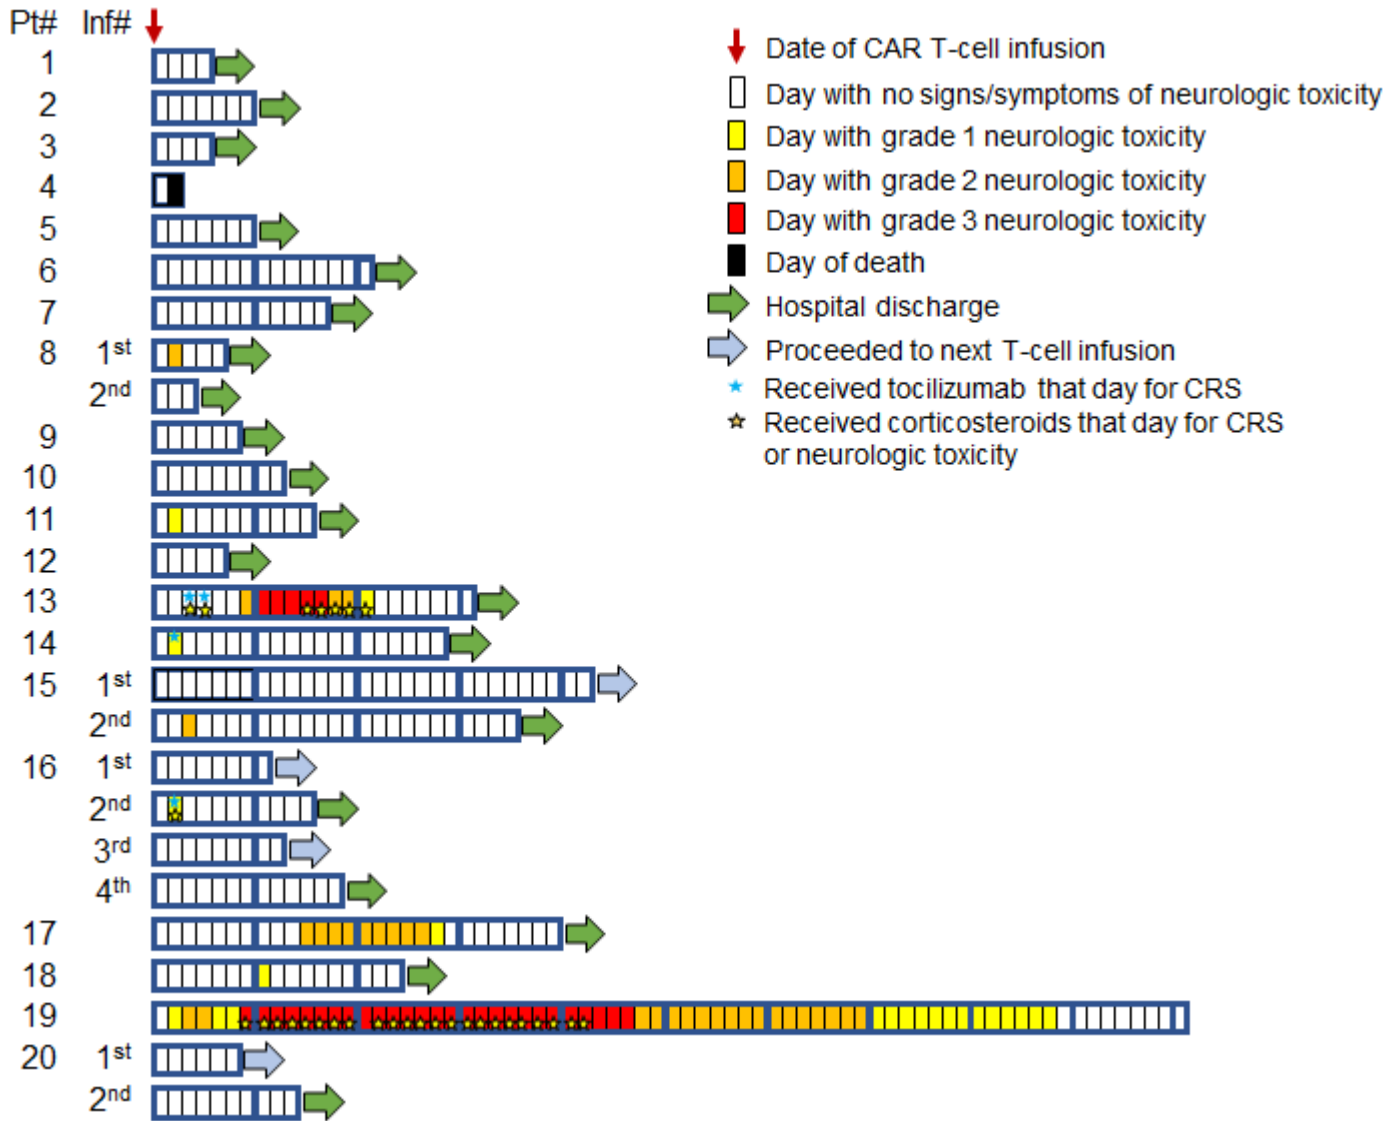

Figure S5

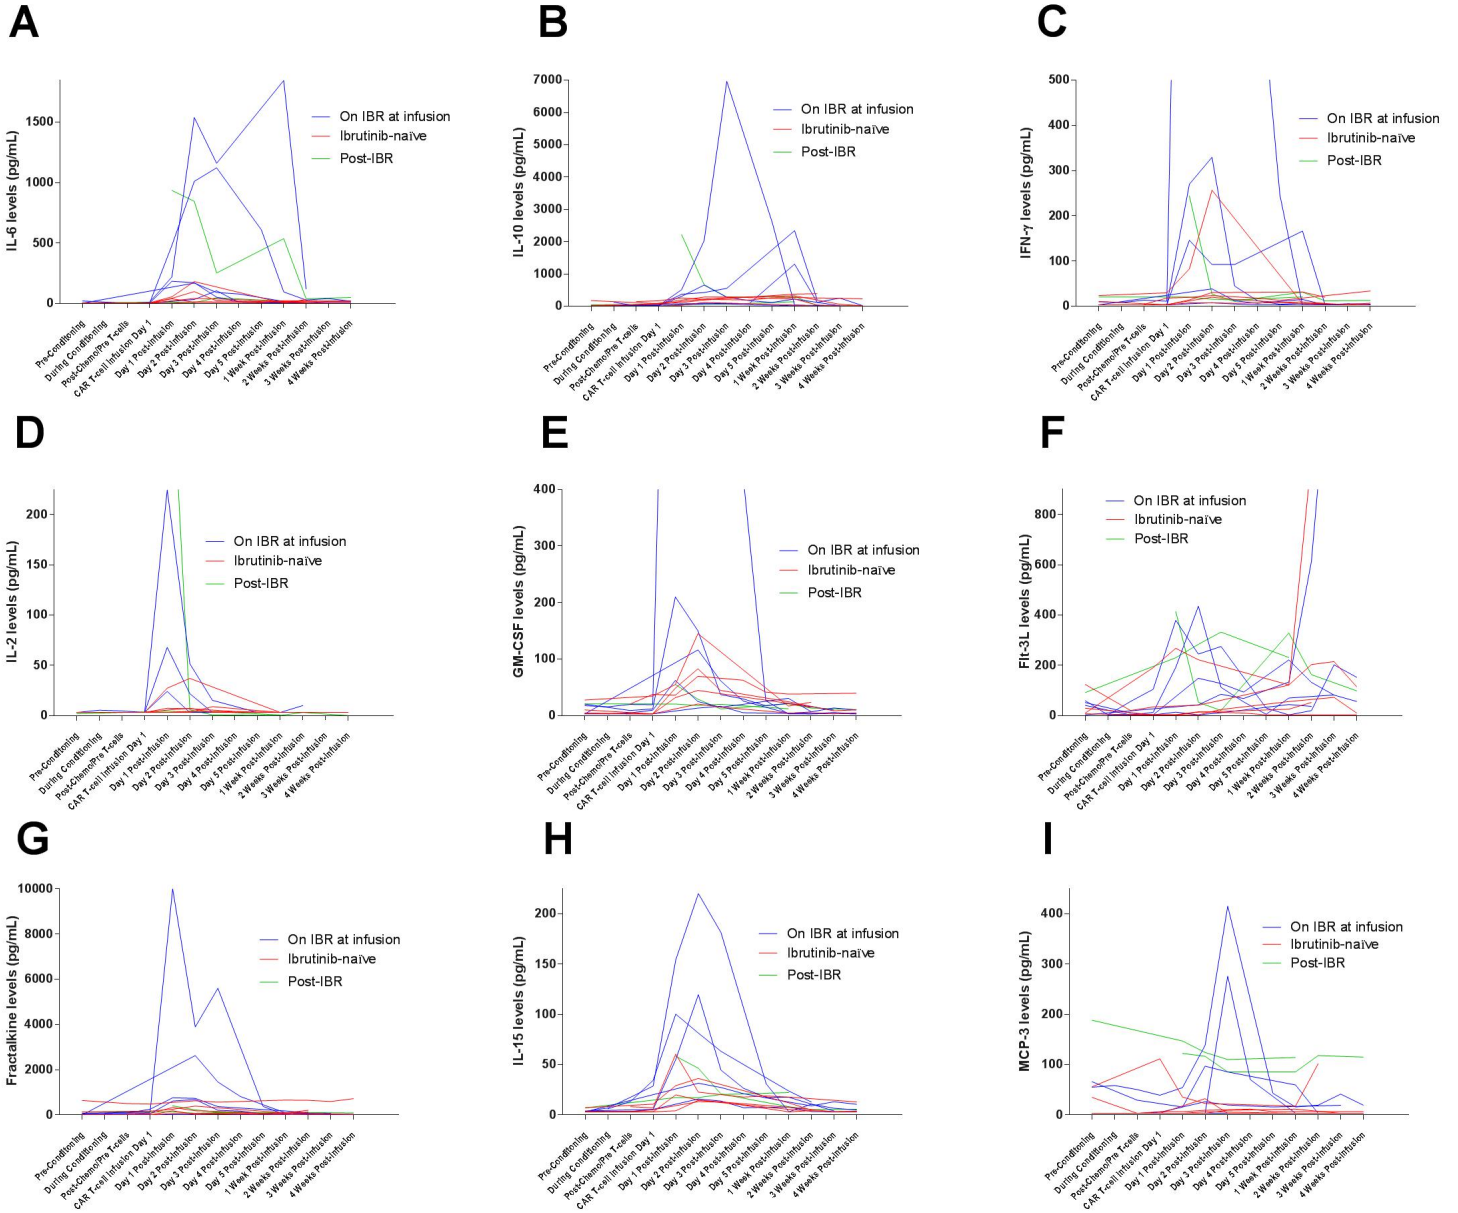

Supplement: sd1 [file 1]
